# Supplementary material for: Solar photocatalysts: non-metal (C, N, and S)-doped ZnO synthesized through an industrially sustainable in situ approach for environmental remediation applications
Source: Royal Society of Chemistry journal article supplement (doi:10.1039/d4ra03492a), 2024-01-01
Supplement: d4ra03492a1.pdf [file d4ra03492a1.pdf]

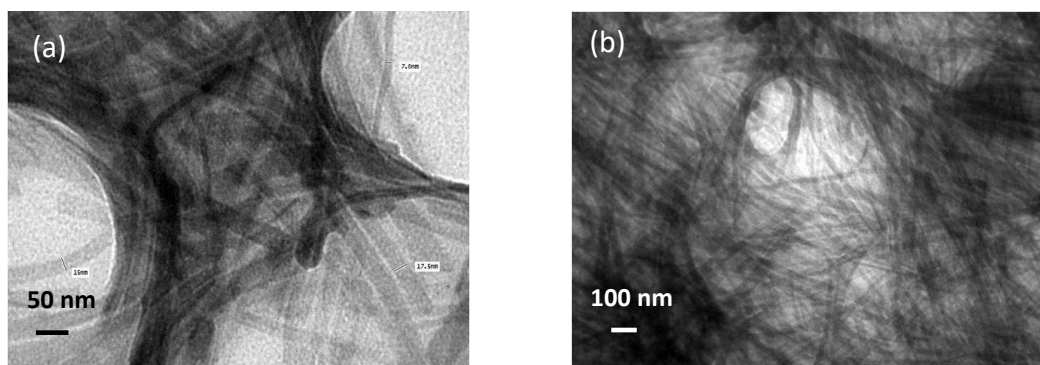

**Fig. S1** TEM images of zinc acetate-tartaric acid (1:1) gels (a) & (b) [200 °C/3h].

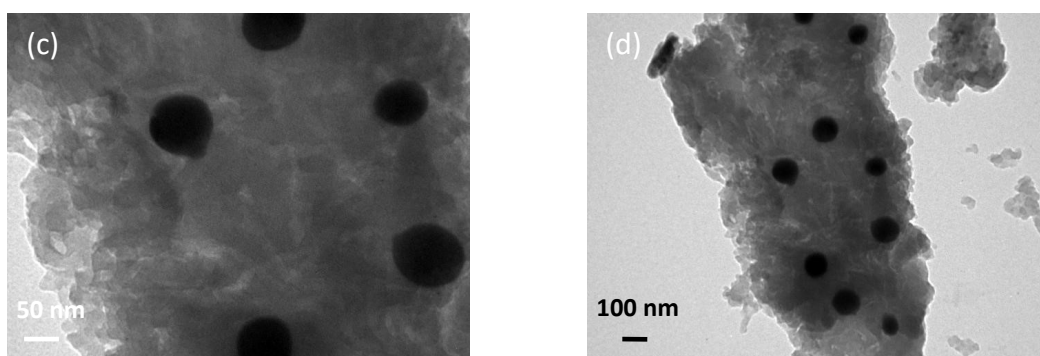

**Fig. S2** TEM images of zinc acetate-tartaric acid (1:1) gels (c) & (d) [300 °C/3h].

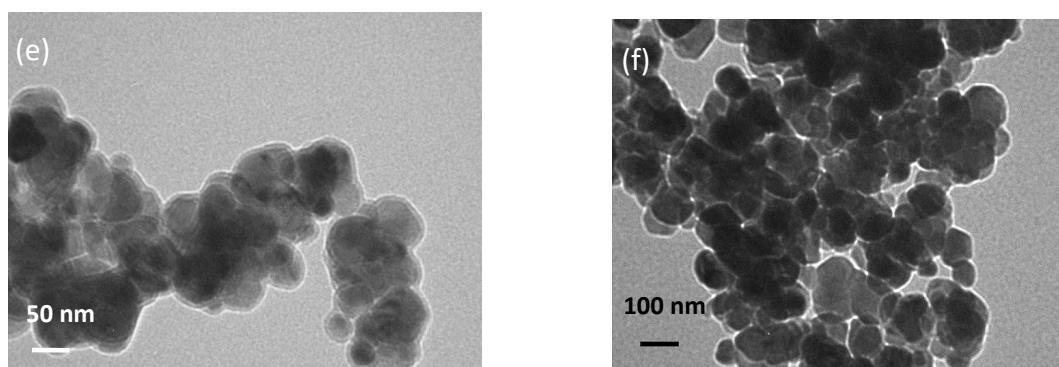

**Fig. S3** TEM images of zinc acetate-tartaric acid (1:1) gels (e) & (f) [400 °C/3h].

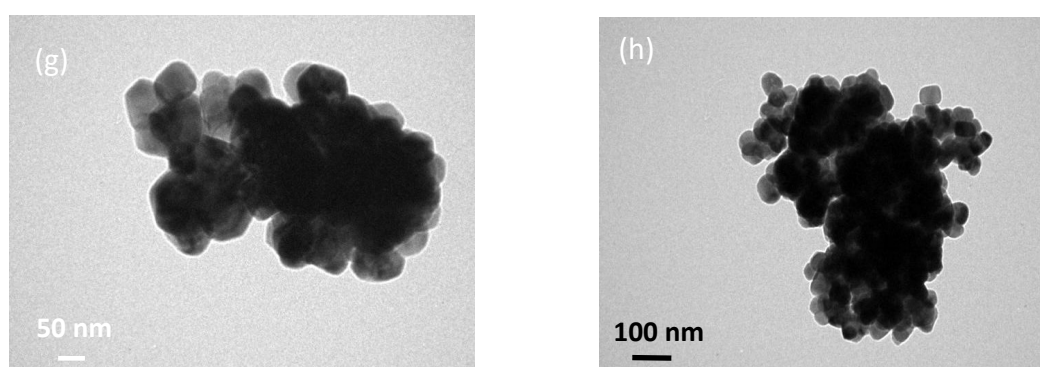

**Fig. S4** TEM images of zinc acetate-tartaric acid (1:1) gels (g) & (h) [500 °C/3h].

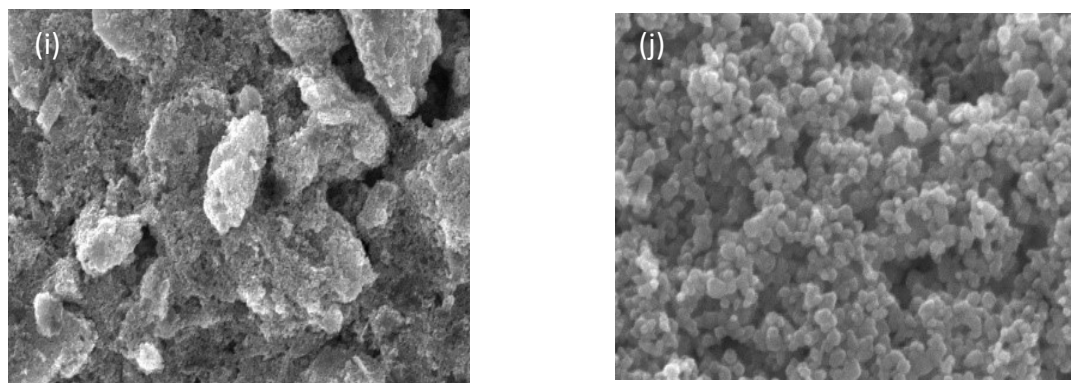

**Fig. S5** SEM images of C-doped zinc oxide nanoparticles at low (a) and high (b) magnifications.

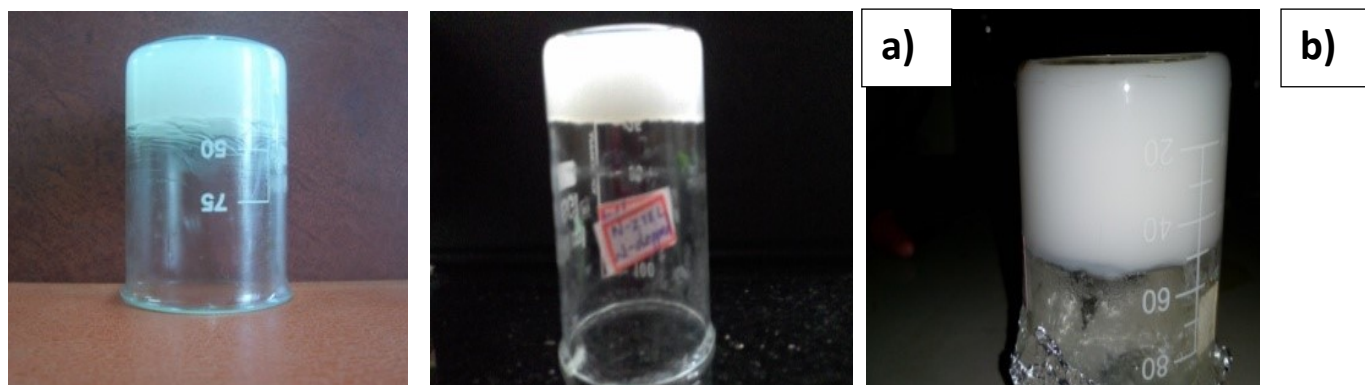

**Fig. S6** Photographic images a) C-ZnO b) N-ZnO & c) S-ZnO gel sample.

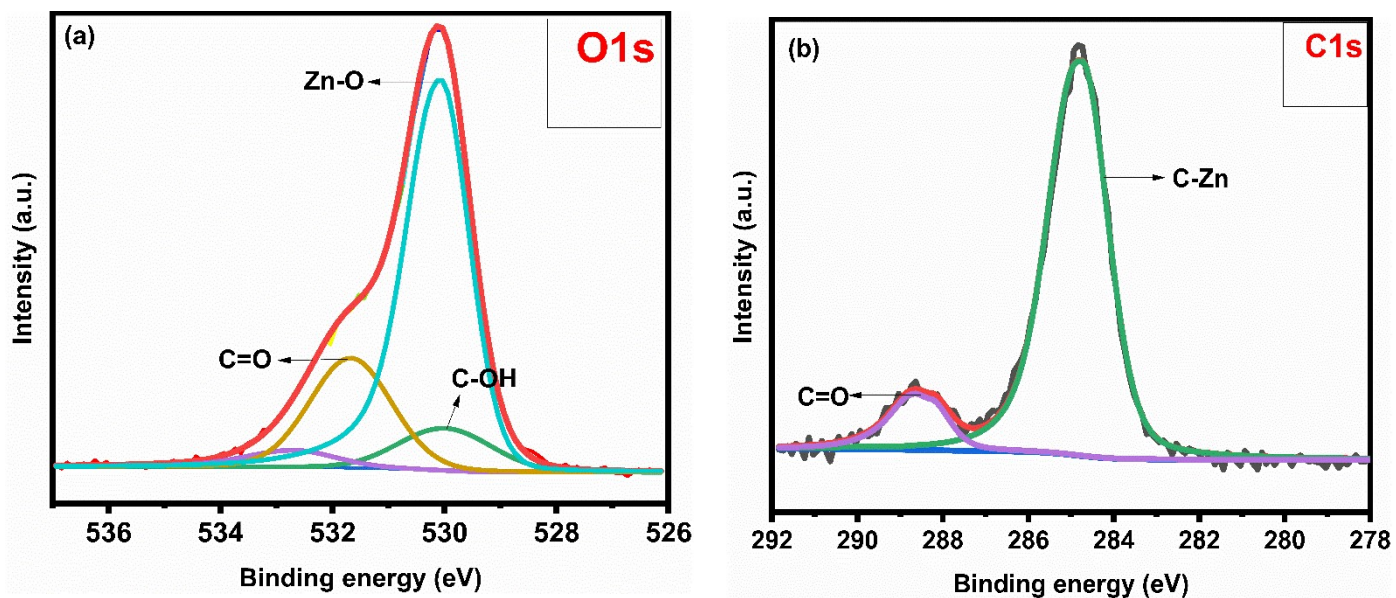

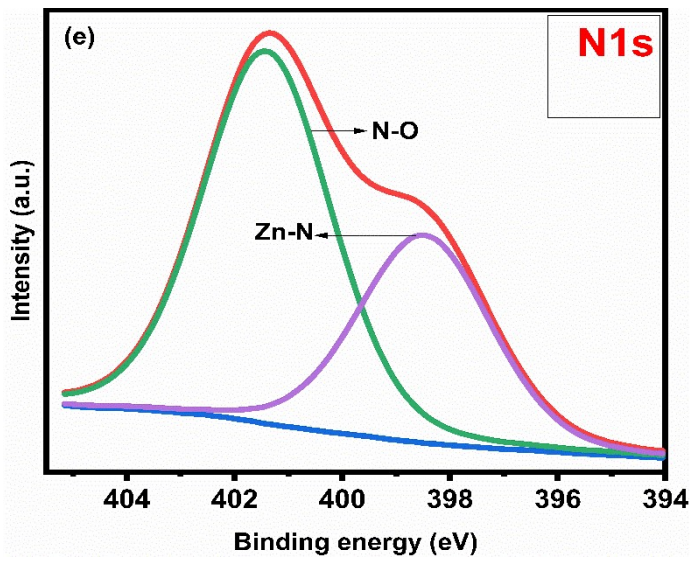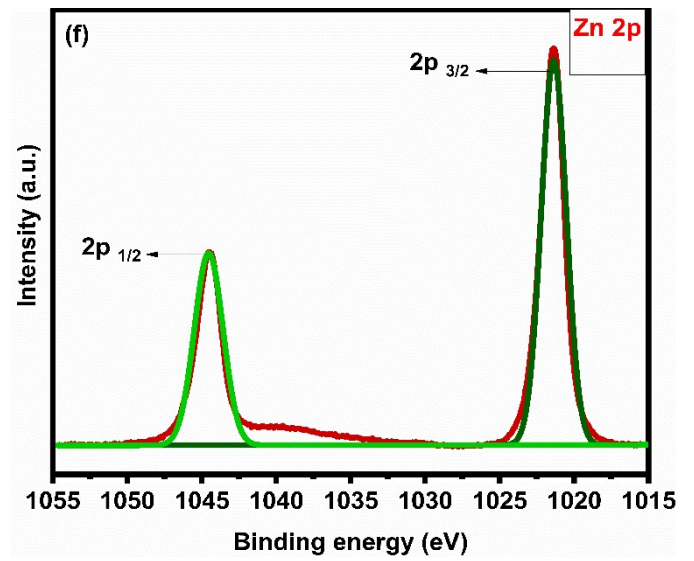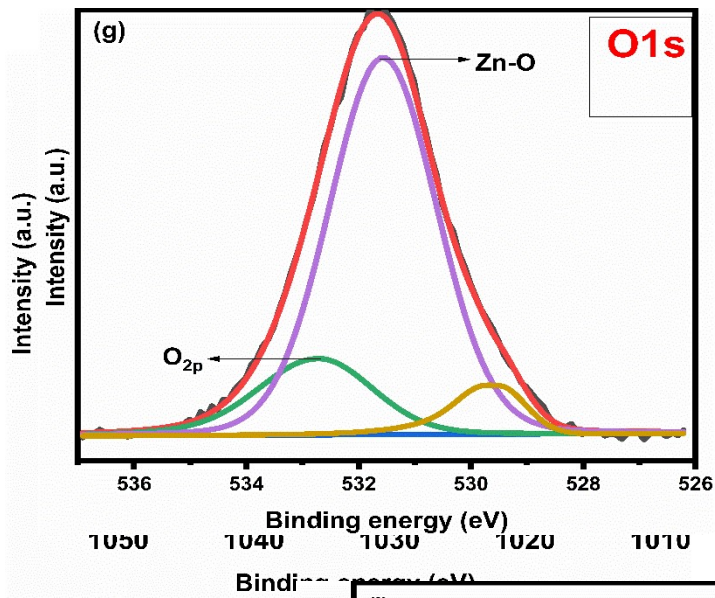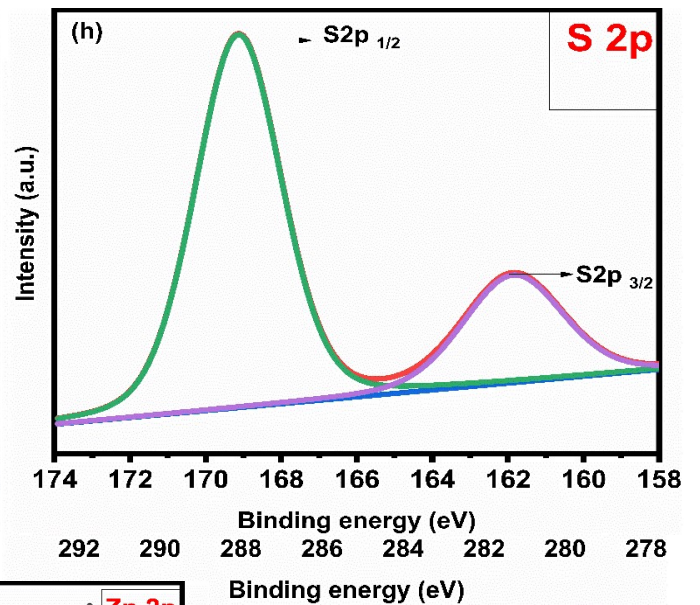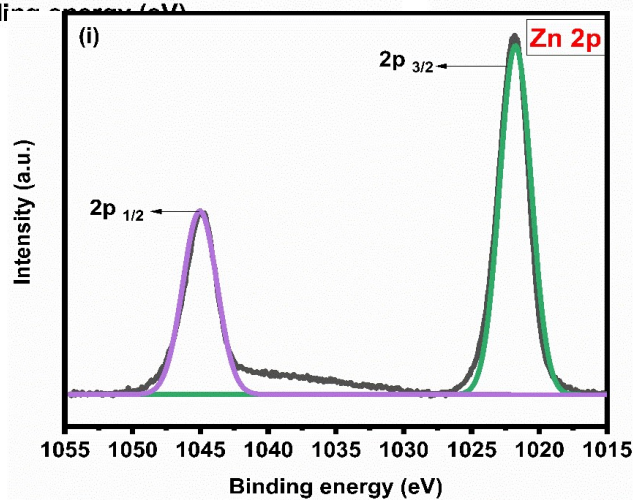

**Fig. S7** High-resolution XPS spectra of (a) O1s, (b) C1s & (c) Zn 2p of C-ZnO. (d) C1s, (e) N1s and (f) Zn 2p of N-ZnO, (g) O1s, (h) C1s and (i) Zn 2p of S-ZnO.

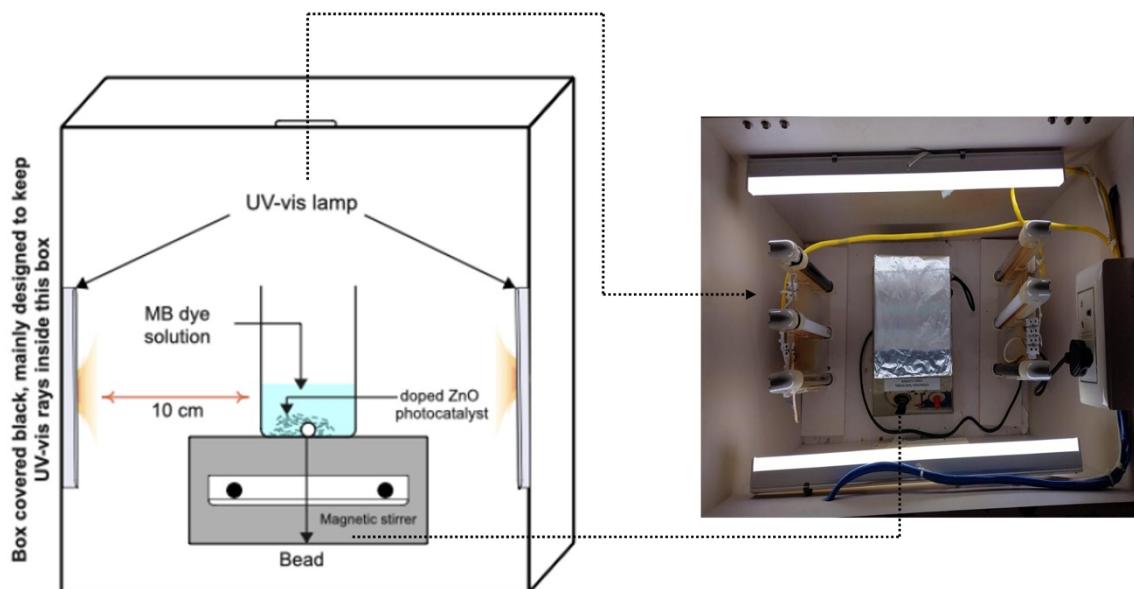

**Fig. S8** Image of the photoreactor used for the photocatalytic degradation of MB.

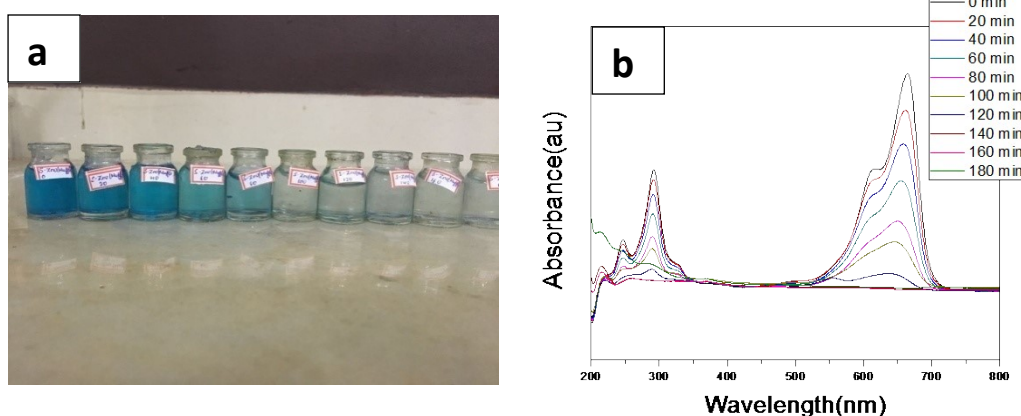

**Fig. S9** Representative images of the photocatalytic degradation of methylene blue (a) and the degradation profile taken using UV-vis. spectrophotometer (b) for the S-doped ZnO samples.

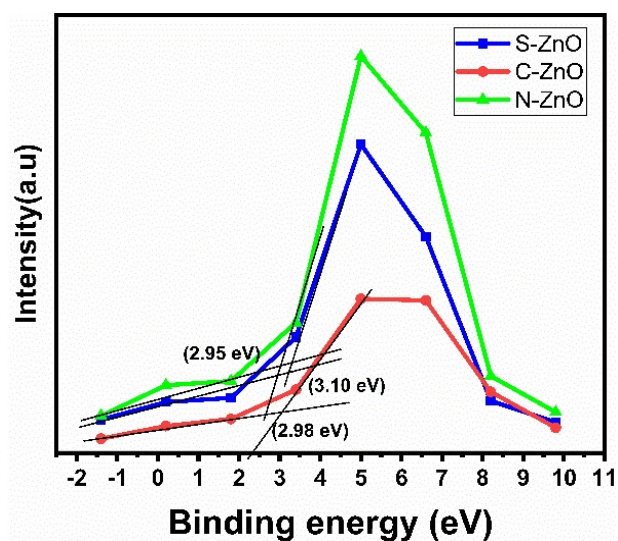

**Fig. S10** Valence Band (VB) energy levels from XPS spectra.

**Table S1** Apparent rate constant ( $k$ ) and  $R^2$  value for degradation of MB in the presence of doped (C, N and S) and undoped ZnO Nanoparticles.

| Photocatalysts | $k \times 10^{-2} \text{ (min}^{-1}\text{)}$<br>( $k_{\text{apparent}}$ ) | $R^2$ (correlation coefficients) |
|----------------|---------------------------------------------------------------------------|----------------------------------|
| C-ZnO          | 1.392                                                                     | 0.99566                          |
| N-ZnO          | 1.951                                                                     | 0.99761                          |
| S-ZnO          | 2.271                                                                     | 0.99902                          |
| ZnO (Standard) | 0.830                                                                     | 0.92060                          |
